# Supplementary material
Source: publisher figshare collection journal article supplement (https://tandf.figshare.com/ndownloader/files/16677092)
Supplement: Supplementary file 1 [file 16677092]

Supplemental 1. Characteristics of the included studies.

| Study type | Author | Year | Country | Study design | Sample size | Mean or median age (years) | study population | Cut-off (ng/ml) | Quality assessment1,2,3 |
| --- | --- | --- | --- | --- | --- | --- | --- | --- | --- |
| Diagnostic value of PCT | Chang15 | 2006 | China | Prospective | 45 | 67 | AECOPD patients in hospitalization, FEV1 %predicted (median)=47% | 0.155 | 10 |
| Daubin16 | 2008 | France | Prospective | 35 | 62.8 | AECOPD patients admitted to ICU, 77% patients with FEV1 %predicted below 50% | 0.25 | 12 |
| Nseir17 | 2008 | France | Prospective | 98 | 68.2 | AECOPD patients admitted to ICU, 97% patients with FEV1 %predicted below 50% | 0.5 | 12 |
| Falsey18 | 2012 | USA | Prospective | 184 | 66.7 | AECOPD patients in hospitalization, lung function was unclear | 0.25 | 9 |
| Tanriverdi19 | 2015 | Turkey | Prospective | 77 | 71.7 | AECOPD patients in hospitalization, FEV1 %predicted (mean)=47% | 0.4 | 13 |
| Ergan20 | 2016 | Turkey | Retrospective | 52 | 71 | AECOPD patients admitted to ICU, 81% patients with FEV1 %predicted below 50% | 0.25 | 12 |
| Li21 | 2017 | China | Prospective | 164 | 66.8 | AECOPD patients in hospitalization, all patients with FEV1 %predicted below 80% | 0.25 | 12 |
| Xiong22 | 2018 | China | Prospective | 78 | 61.9 | AECOPD patients in hospitalization, 42% patients with FEV1 %predicted below 50% | 0.76 | 12 |
| PCT guided antibiotic therapy | Christ-Crain23 | 2004 | Switzerland | Single-center, RCT | 60 | 70.5 | AECOPD patients from medical emergency department, FEV1 %predicted (mean)=44.7% | 0.25 | 4 |
| Stolz24 | 2007 | Switzerland | Single-center, RCT | 208 | 69.5 | AECOPD patients from medical emergency department, 75% patients with FEV1 %predicted below 50% | 0.25 | 3 |
| Schuetz25 | 2009 | Switzerland | Multi-center, RCT | 228 | NA | AECOPD patients from medical emergency department, lung function was unclear | 0.25 | 5 |
| Nangia26 | 2012 | Finland | Single-center, RCT | 100 | NA | AECOPD patients in hospitalization, lung function was unclear | 0.5 | 2 |
| Liu27 | 2015 | China | Single-center, RCT | 108 | 69.4 | AECOPD patients in hospitalization, 84% patients with FEV1 %predicted below 50% | 0.25 | 2 |
| Verduri28 | 2015 | Italy | Multi-center, RCT | 178 | 73 | AECOPD patients in hospitalization, 67% patients with FEV1 %predicted below 50% | 0.25 | 5 |
| Corti29 | 2016 | Denmark | Single-center, RCT | 120 | 72 | AECOPD patients from medical emergency department, FEV1 %predicted (median)=40% | 0.25 | 5 |
| Daubin30 | 2018 | France | Multi-center, RCT | 302 | 67 | AECOPD patients addmitted to ICU, 67% patients with FEV1 %predicted below 50% | 0.25 | 5 |
| Huang31 | 2018 | USA | Multi-center, RCT | 524 | NA | AECOPD patients from medical emergency department, lung function was unclear | 0.25 | 5 |
| Picart32 | 2016 | Reunion | Single-center, Retrospective | 245 | 75 | AECOPD patients from medical emergency department, 63% patients with FEV1 %predicted below 50% | 0.25 | 6 |
| Bremmer33 | 2018 | USA | Multi-center, Retrospective | 305 | 66 | AECOPD patients in hospitalization, lung function was unclear | 0.25 | 8 |
| Sabrine34 | 2018 | Tunisia | Single-center, Retrospective | 93 | NA | AECOPD patients admitted to ICU, lung function was unclear | 0.25 | 5 |
| Townsend35 | 2018 | USA | Single-center, Retrospective | 100 | NA | AECOPD patients from medical emergency department, 75% patients with FEV1 %predicted below 50% | 0.25 | 7 |
| Antibiotics treatment in low PCT levels | Wang36 | 2016 | China | Single-center, RCT | 191 | 72.9 | AECOPD patients in hopitalization with PCT level ＜0.1 ng/ml, FEV1 %predicted (mean)=37.6% | 0.1 | 5 |
| Bremmer37 | 2018 | USA | Multi-center, Retrospective | 356 | 66.2 | AECOPD patients in hopitalization with PCT level ＜0.25 ng/ml, lung function was unclear | 0.25 | 8 |

PCT, procalcitonin; RCT, randomized controlled trial; AECOPD, acute exacerbations of chronic obstructive pulmonary disease; ICU, intensive care unit; NA, not available.

1 The quality and bias of the diagnostic studies were assessed using the Quality Assessment of Diagnostic Accuracy Studies (QUADAS) checklist.

2 The quality and bias of the RCT studies were assessed using the Jadad score.

3 The quality and bias of the cohort studies were assessed using the modified Newcastle-Ottawa scale (NOS).


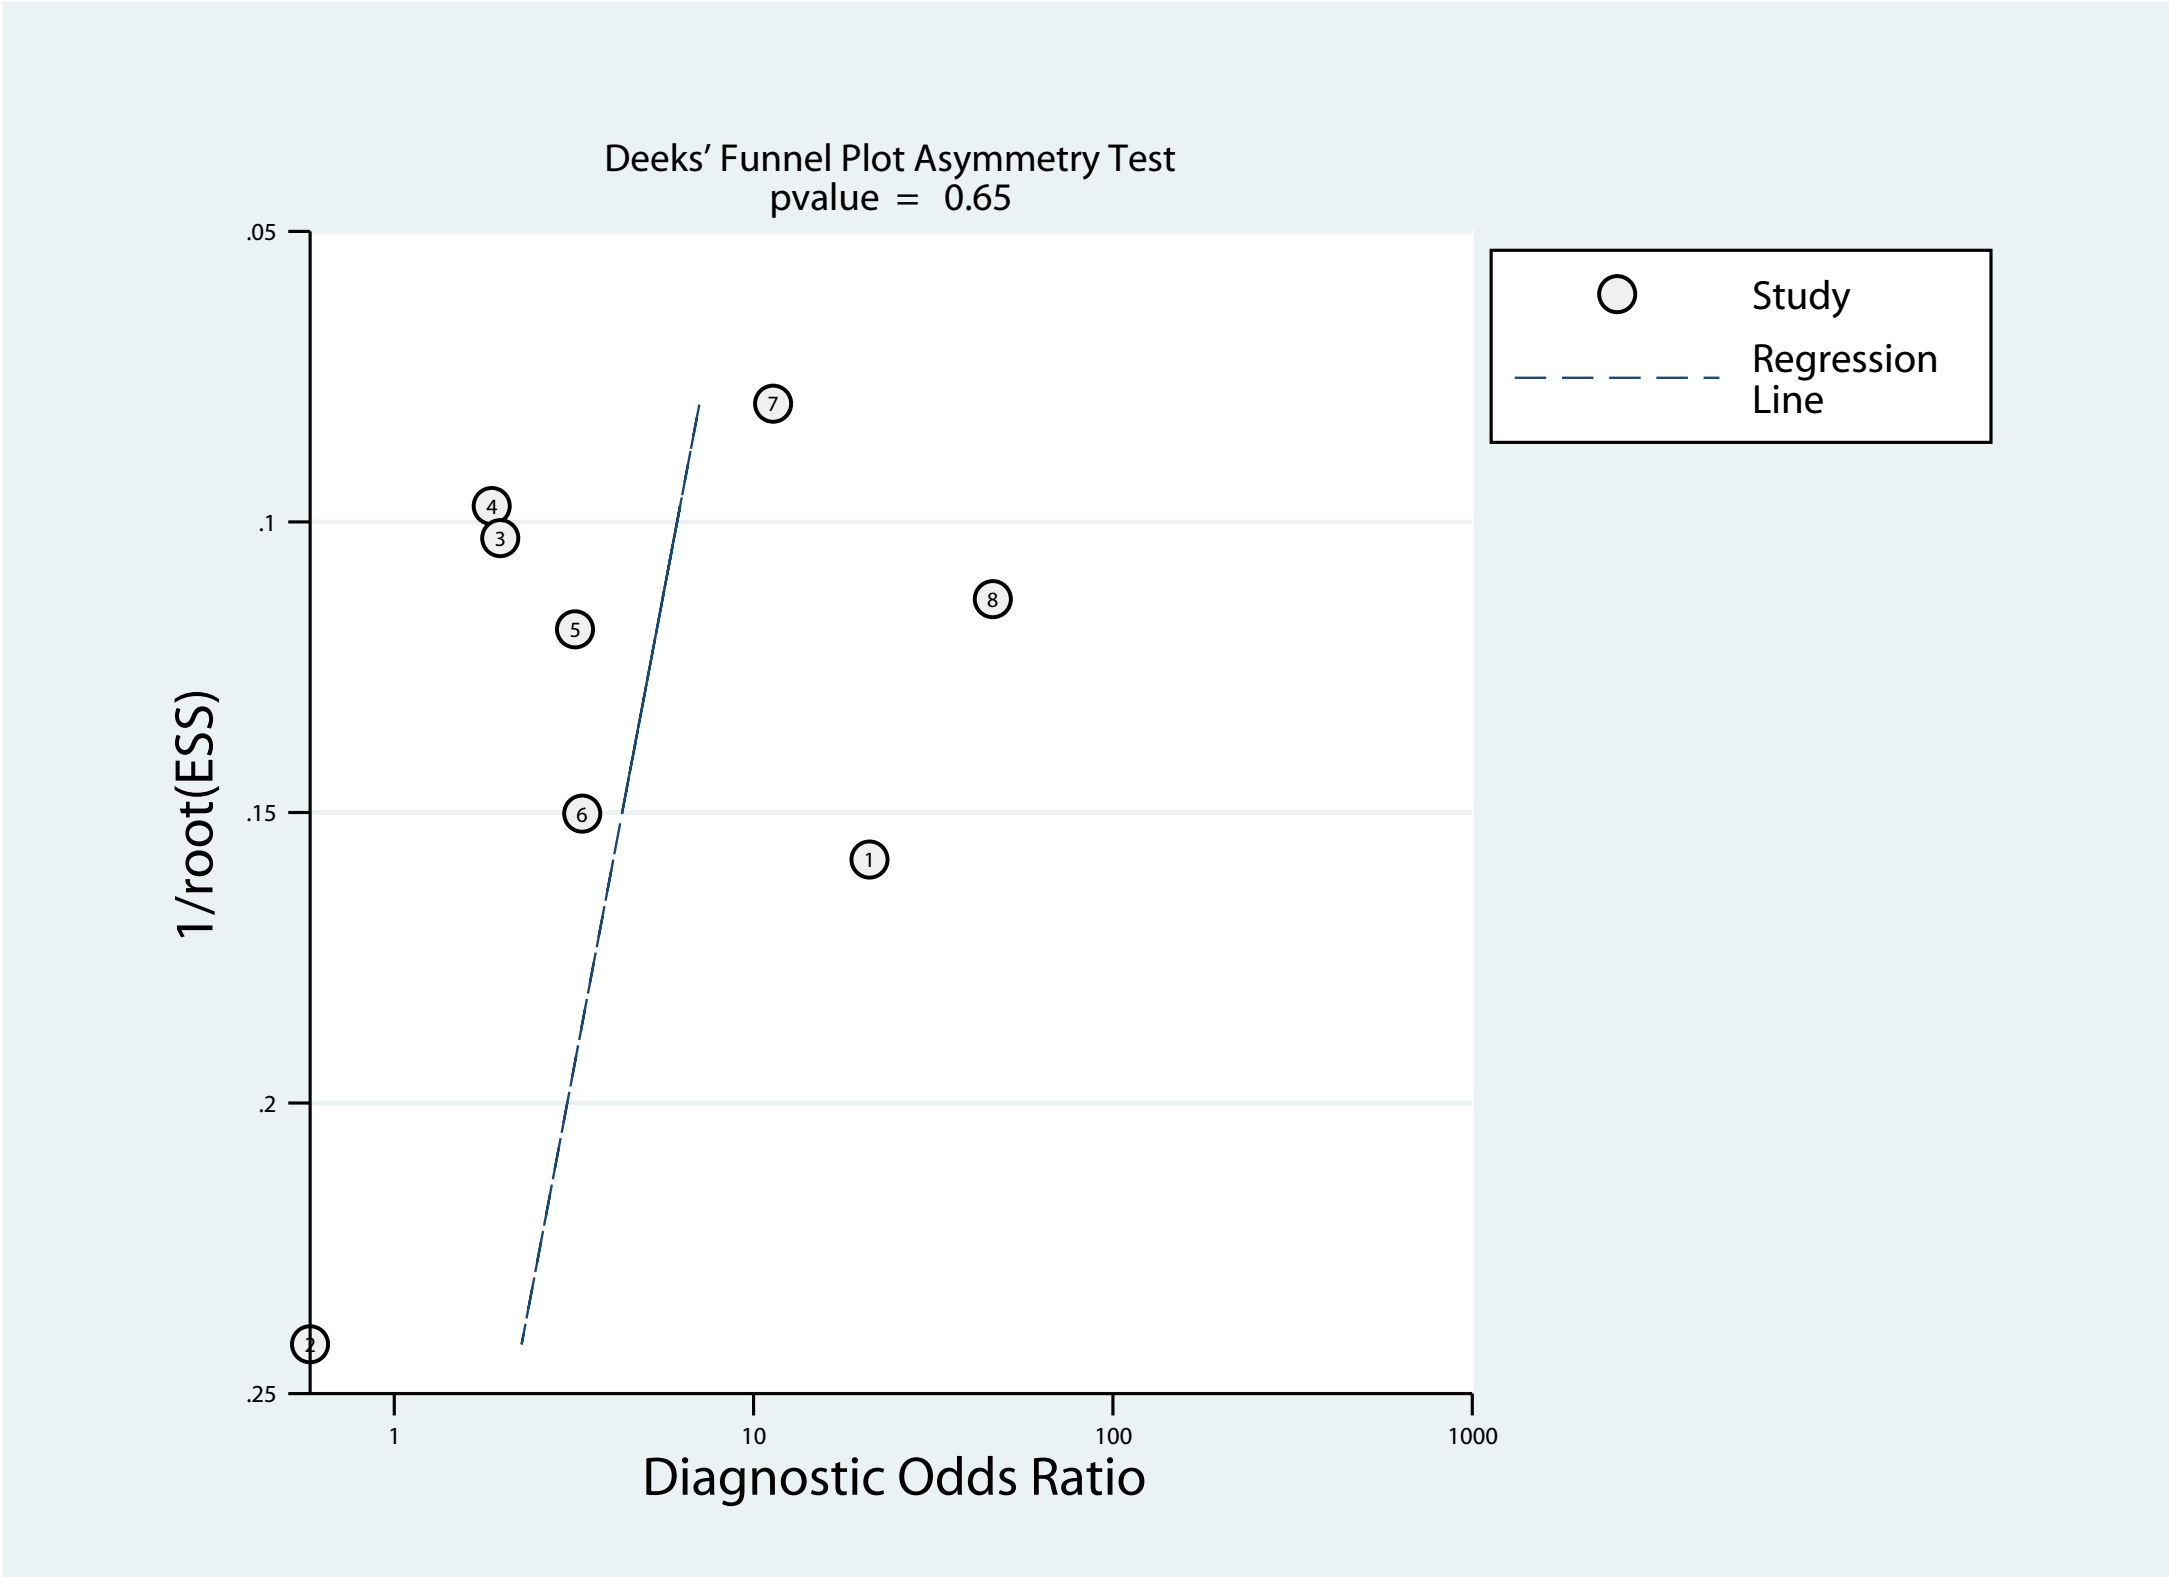


Supplemental 2. Deek’s funnel plot asymmetry test for publication bias of studies evaluating the value of PCT for the diagnosis of respiratory bacterial infections.


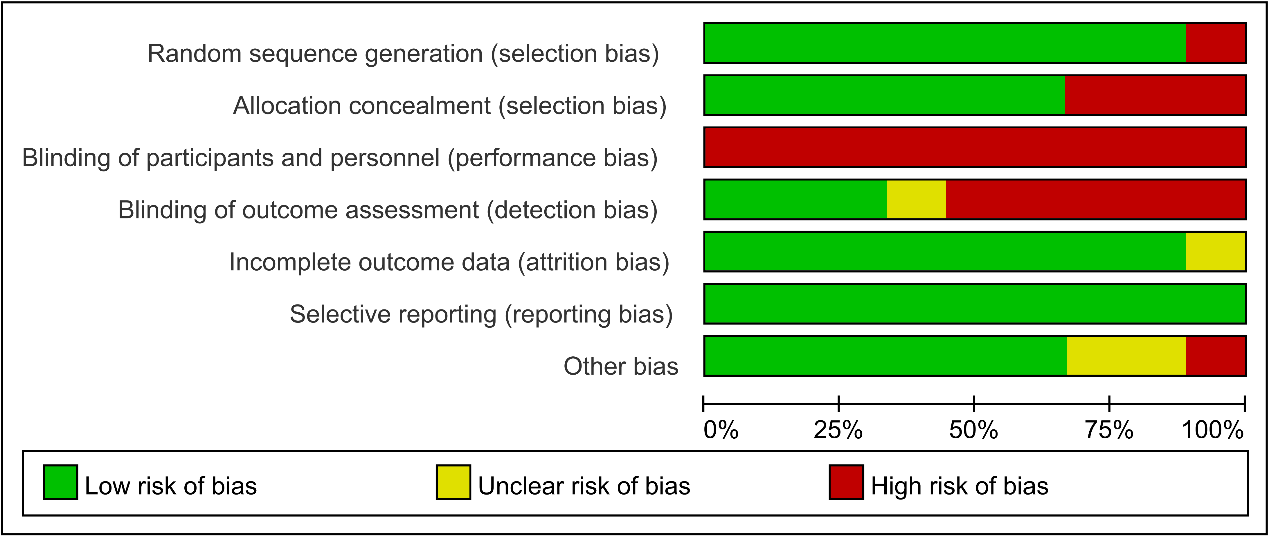


Supplemental 3. Risk of bias graph on included randomized controlled trials.


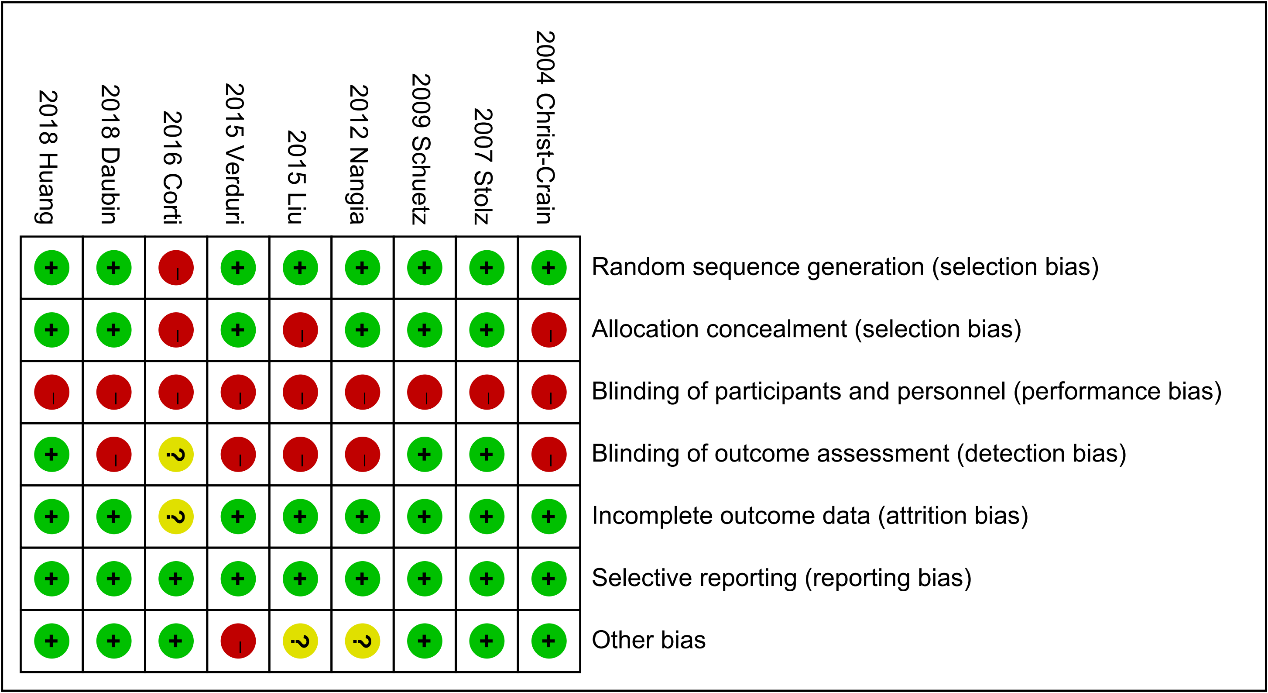


Supplemental 4. Risk of bias summary on included randomized controlled trials.


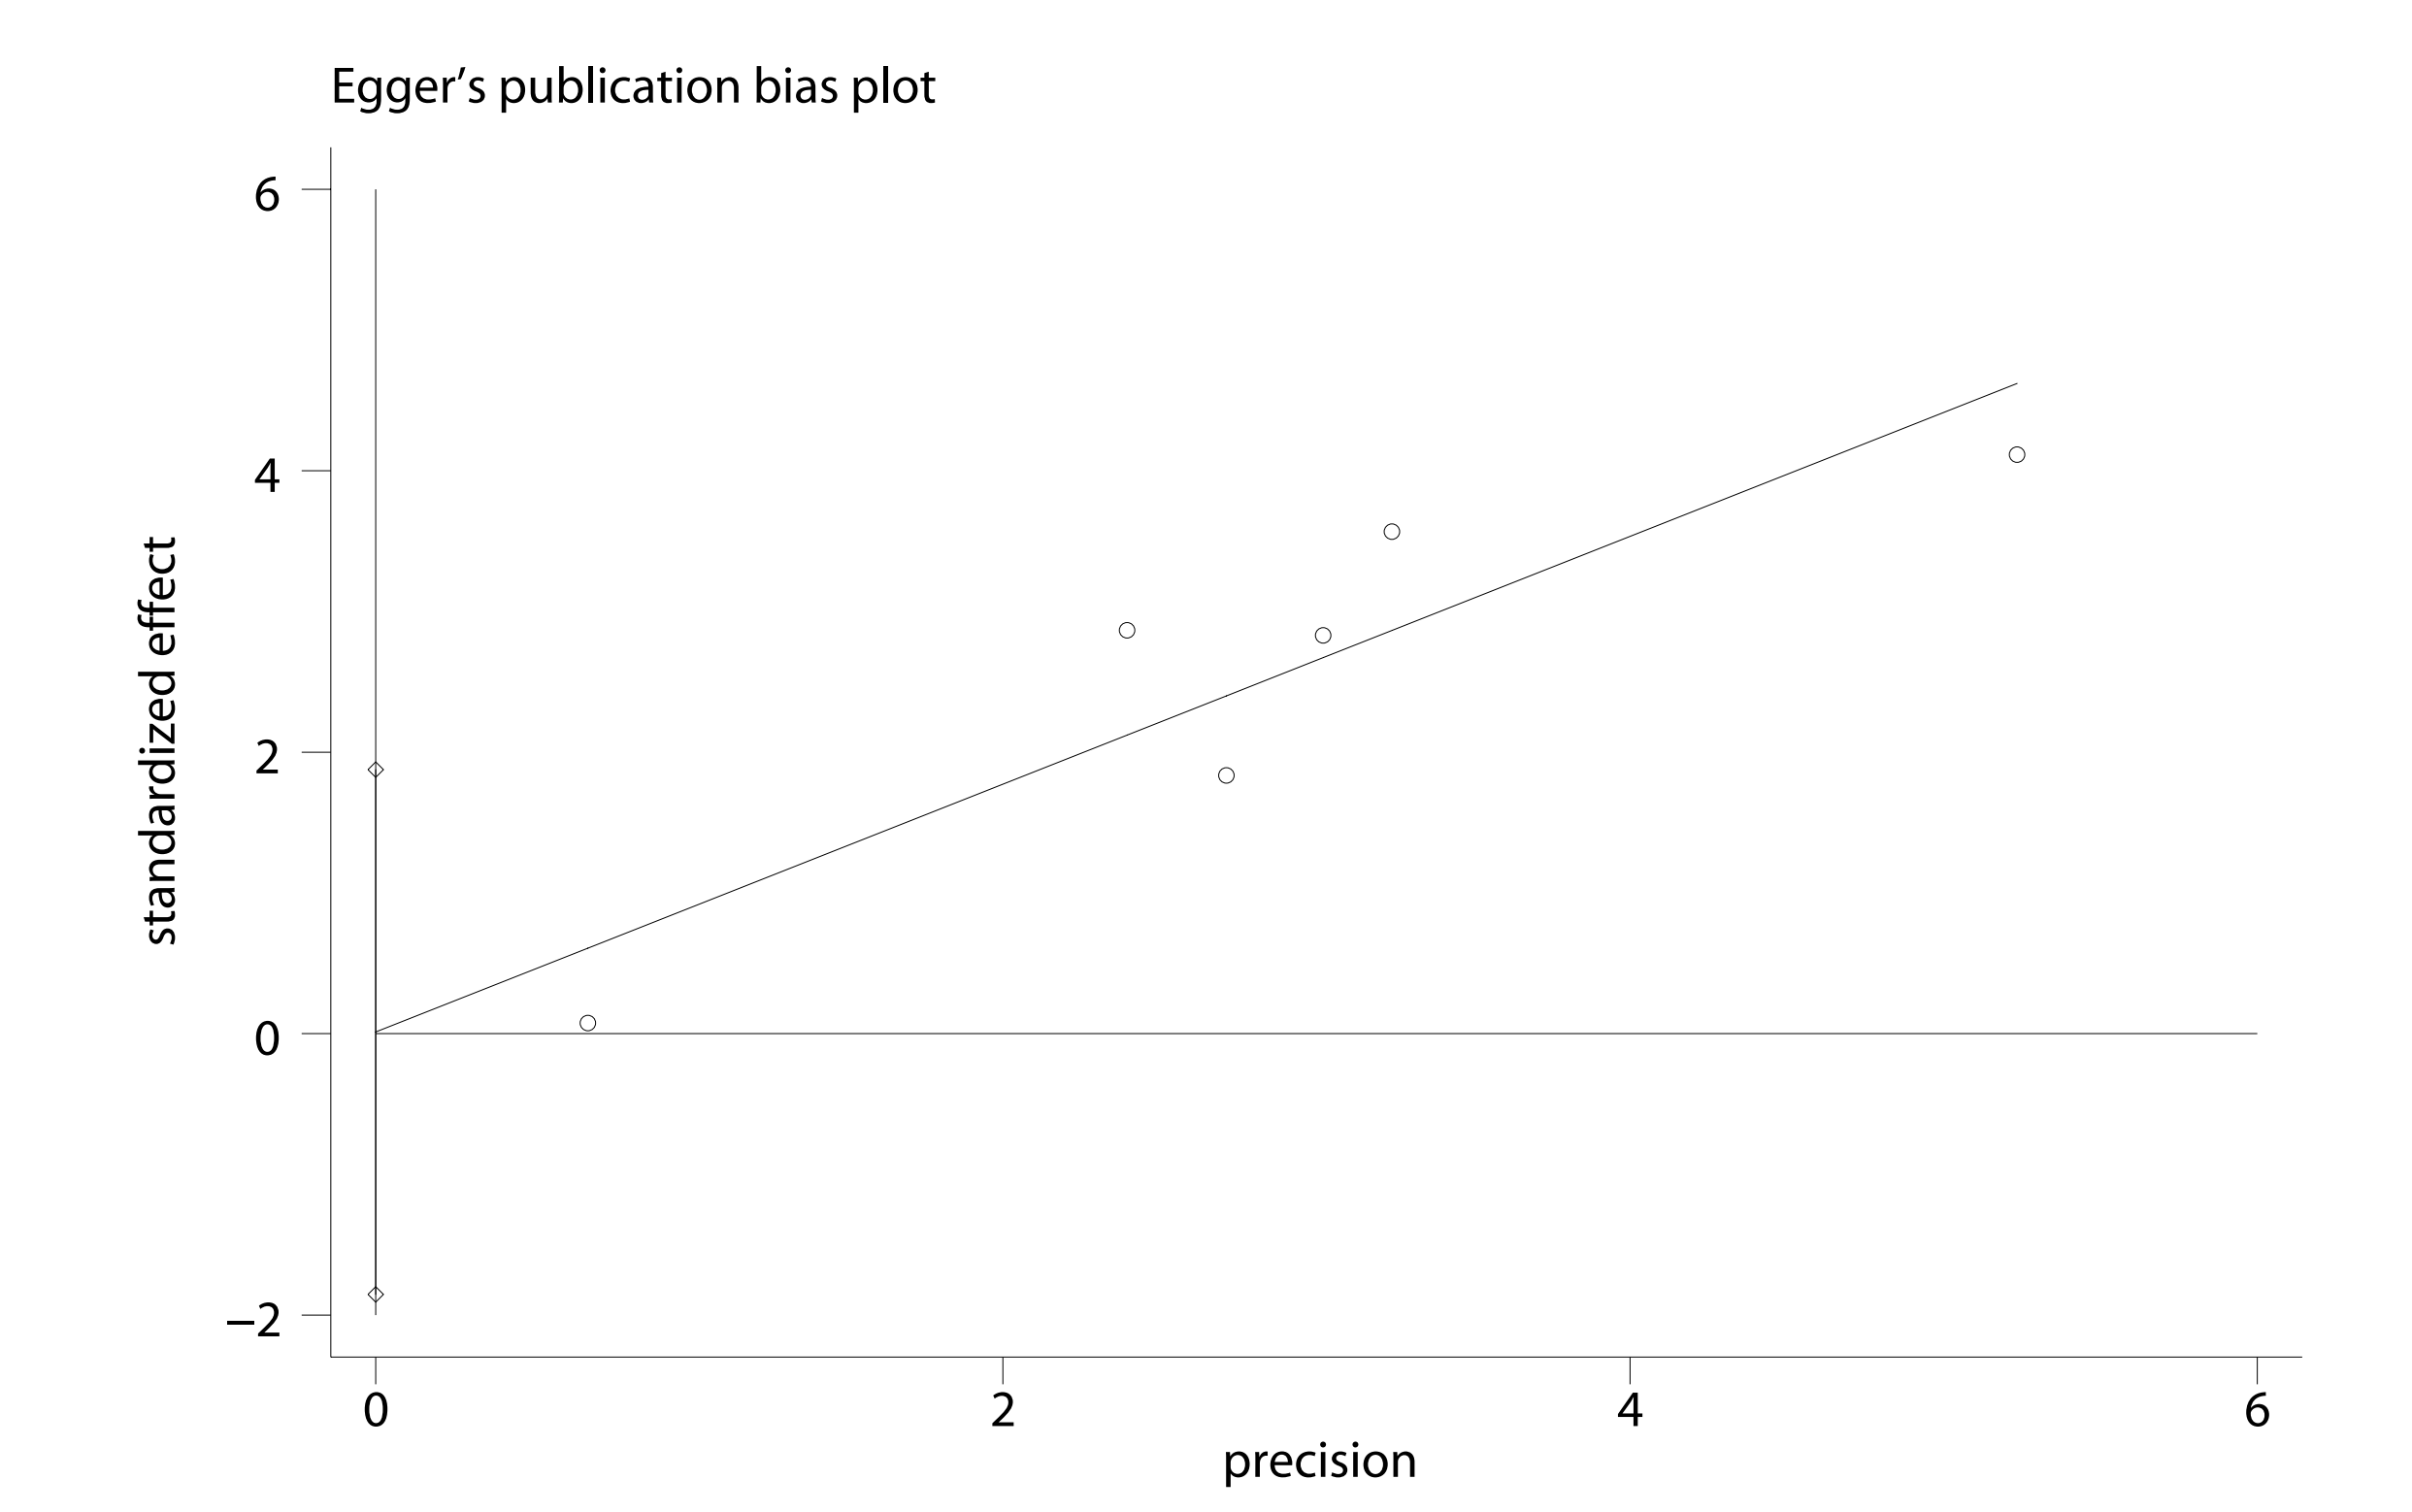


Supplemental 5. A funnel plot of PCT-guided treatment on treatment failure for the index exacerbation in patients with AECOPD.


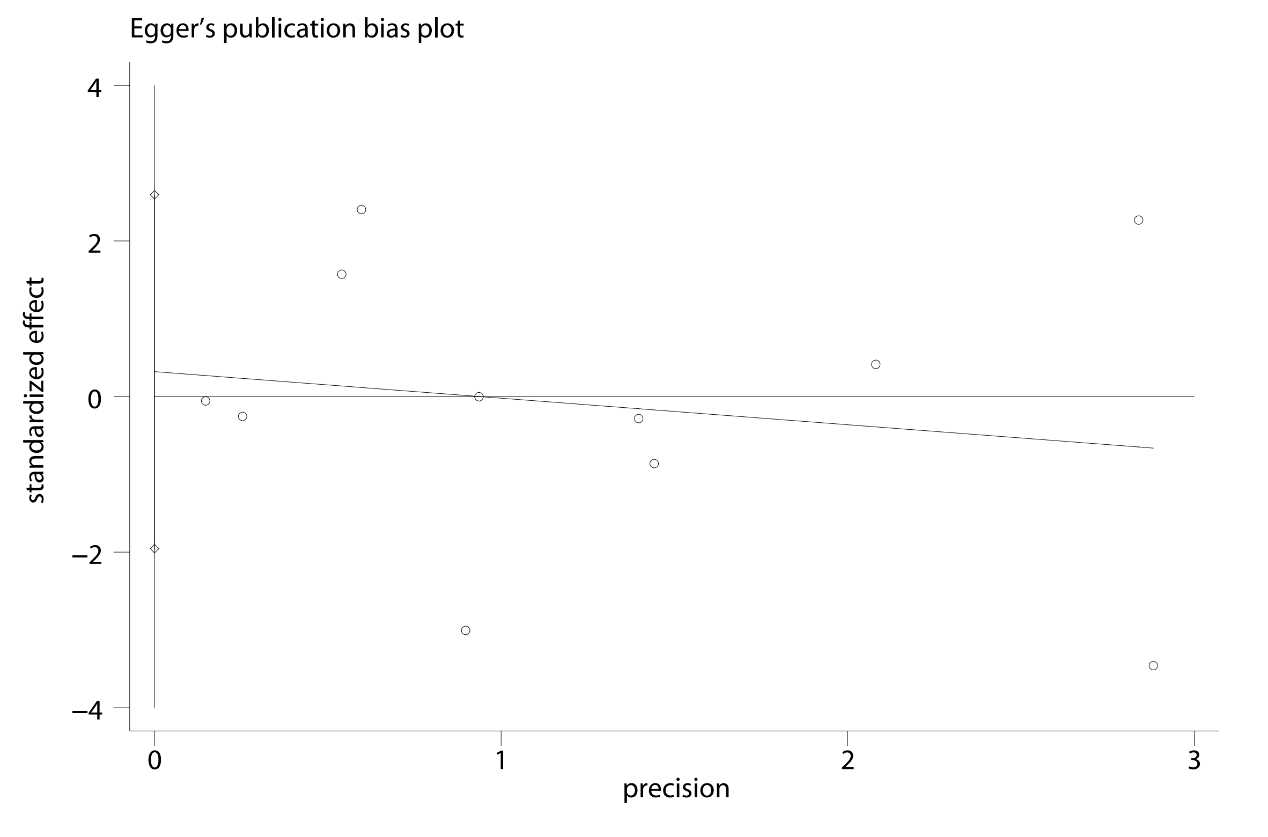


Supplemental 6. A funnel plot of PCT-guided treatment on length of hospital stay for the index exacerbation in patients with AECOPD.


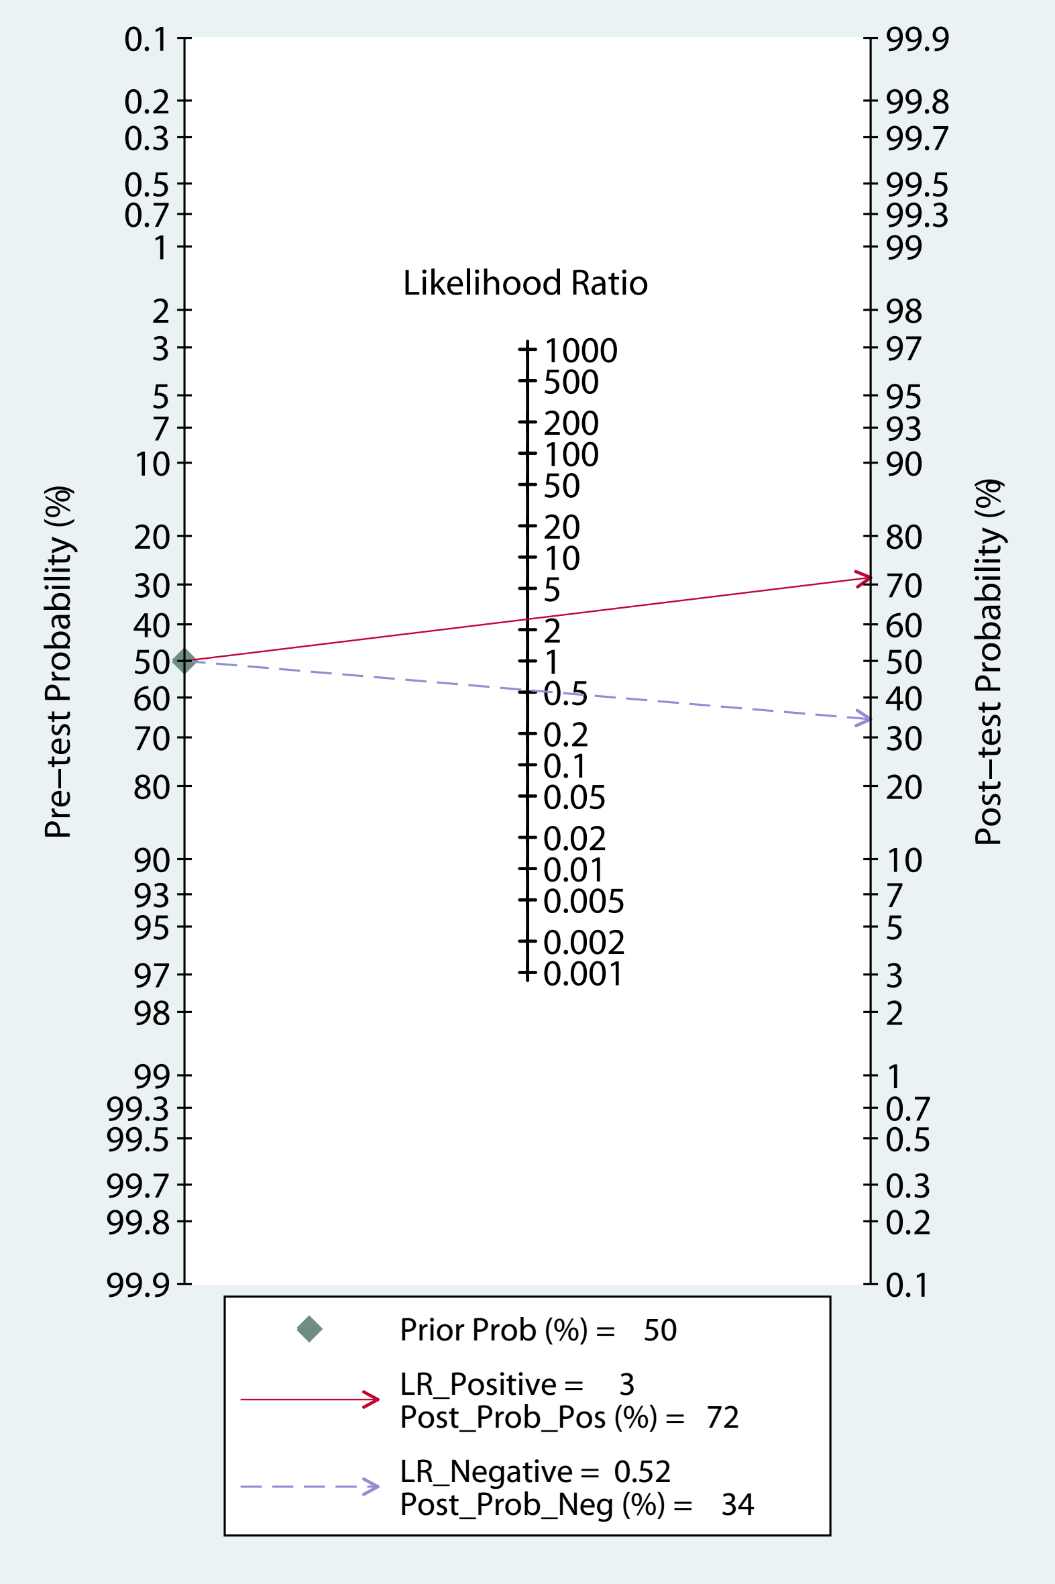


Supplemental 7. Fagan’s nomogram for calculation of post-test probabilities. Fagan’s nomogram for PCT illustrates post-test probability with fixed pre-test probability of 50 % for respiratory bacterial infection in AECOPD. LR likelihood ratio, *pos* positive, *neg* negative.


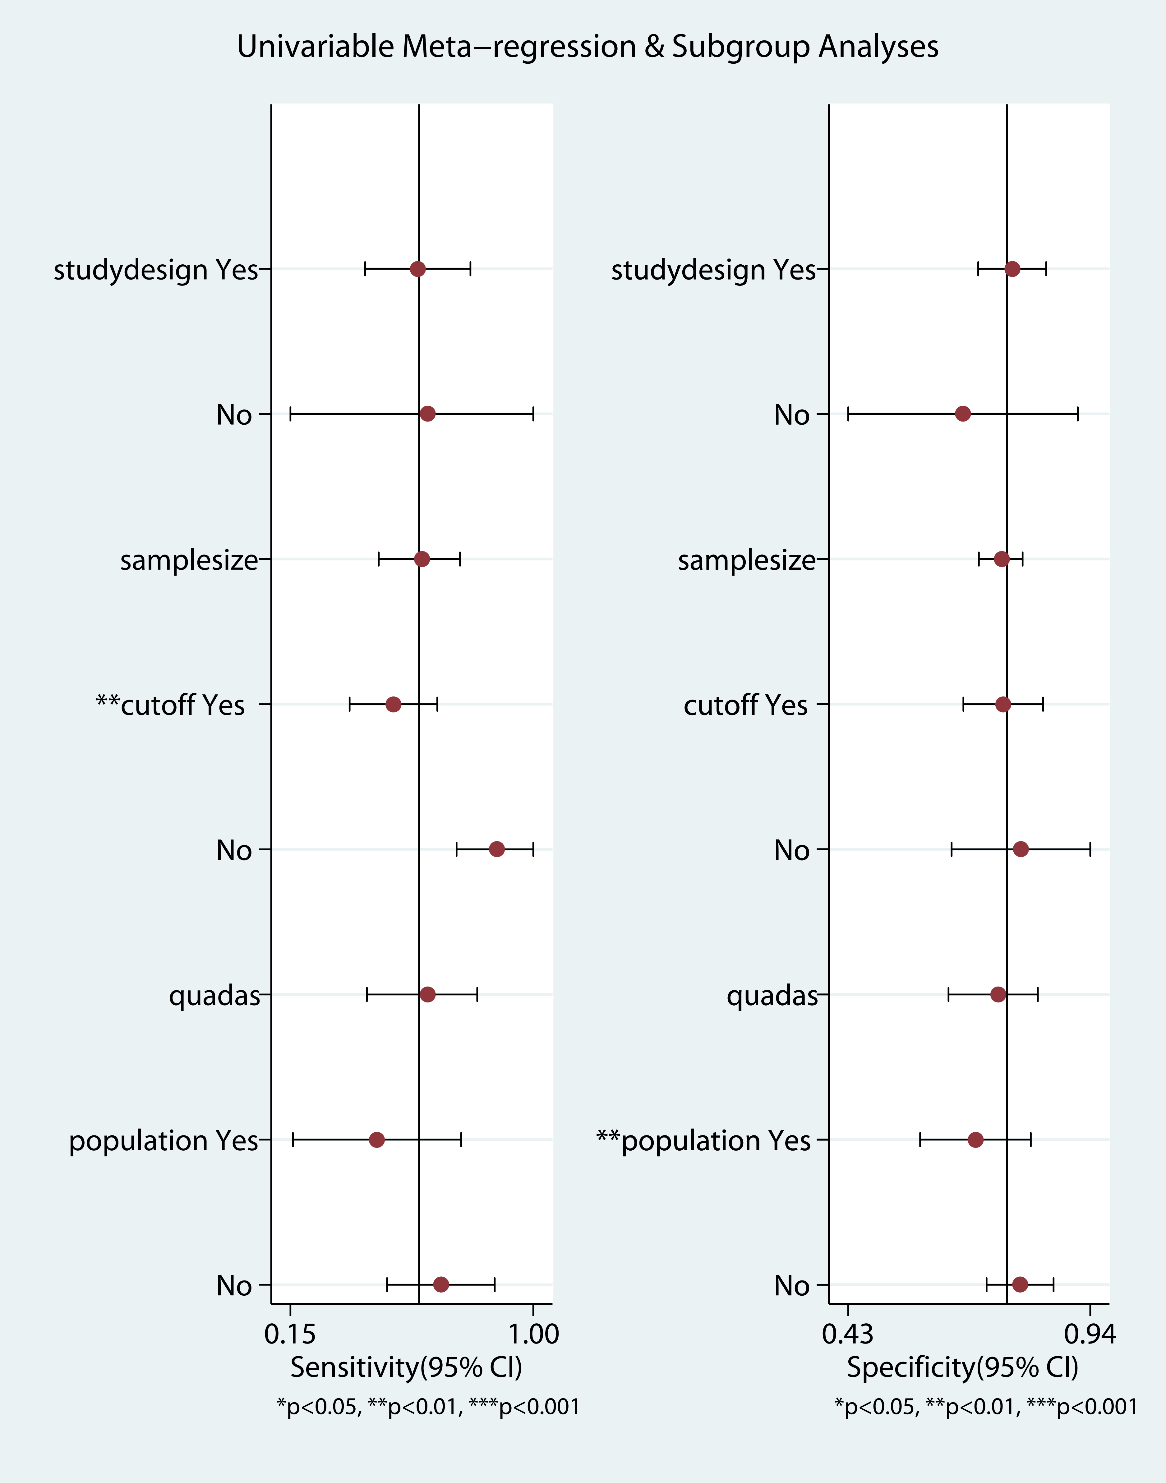


Supplemental 8. Univariate meta-regression and subgroup analysis of studies evaluating PCT for the diagnosis of respiratory bacterial infections.

Supplemental 9. Quality of the evidence (GRADE) on PCT-guided antibiotic treatment in COPD exacerbation.

| **Quality assessment** | | | | | | | **No of patients** | | **Effect** | | **Quality** | **Importance** |
| --- | --- | --- | --- | --- | --- | --- | --- | --- | --- | --- | --- | --- |
|
| **No of studies** | **Design** | **Risk of bias** | **Inconsistency** | **Indirectness** | **Imprecision** | **Other considerations** | **PCT algorithm** | **Control** | **Relative (95% CI)** | **Absolute** |
| **Treatment failure** | | | | | | | | | | | | |
| 6 | randomised trials | serious1 | no serious inconsistency | no serious indirectness | serious2 | none | 83/469  (17.7%) | 99/473  (20.9%) | RR 0.85 (0.66 to 1.09) | 31 fewer per 1000 (from 71 fewer to 19 more) |  LOW | CRITICAL |
| **Lenght of hospitalization for the index exacerbation (Better indicated by higher values)** | | | | | | | | | | | | |
| 9 | randomised trials | serious1 | no serious inconsistency | no serious indirectness | no serious imprecision2 | none | 914 | 914 | - | MD 0.17 higher (-0.88 lower to 1.22 higher) |  MODERATE | IMPORTANT |
| **Antibiotic exposure** | | | | | | | | | | | | |
| 9 | randomised trials | serious1 | no serious inconsistency | no serious indirectness | no serious imprecision | none | 454/914  (49.7%) | 670/914  (73.3%) | RR 0.68 (0.63 to 0.73) | 235 fewer per 1000 (from 198 fewer to 271 fewer) |  MODERATE | IMPORTANT |
| **Mean duration of the use of antibiotics (Better indicated by lower values)** | | | | | | | | | | | | |
| 7 | randomised trials | serious1 | no serious inconsistency | no serious indirectness | no serious imprecision | none | 760 | 752 | - | MD -2.60 lower (-4.48 to 0.72 lower) |  MODERATE | IMPORTANT |
| **Mortality at longest follow-up** | | | | | | | | | | | | |
| 8 | randomised trials | no serious risk of bias | no serious inconsistency | no serious indirectness | Serious2 | none | 50/649  (7.7%) | 45/655  (6.9%) | RR 1.12 (0.77 to 1.63) | 8 more per 1000 (from 16 fewer to 43 more) |  MODERATE | IMPORTANT |
| **Exacerbation recurrence rate at longest follow-up** | | | | | | | | | | | | |
| 5 | randomised trials | serious1 | no serious inconsistency | no serious indirectness | Serious2 | none | 133/378  (35.2%) | 140/386  (36.3%) | RR 0.99 (0.83 to 1.16) | 4 fewer per 1000 (from 62 fewer to 58 more) |  LOW | IMPORTANT |
| **Re-hospitalization rate at longest follow up** | | | | | | | | | | | | |
| 6 | randomised trials | serious1 | no serious inconsistency | no serious indirectness | Serious2 | none | 91/482  (18.9%) | 80/486  (16.5%) | RR 1.15 (0.88 to 1.5) | 25 more per 1000 (from 20 fewer to 82 more) |  LOW | IMPORTANT |

1 None of the included trials was blinded
2 Not meeting optimal information size (OIS) criterion. OIS criterion was calculated accepting a Type 1 error rate a=0.05 and Power 1-β=80%


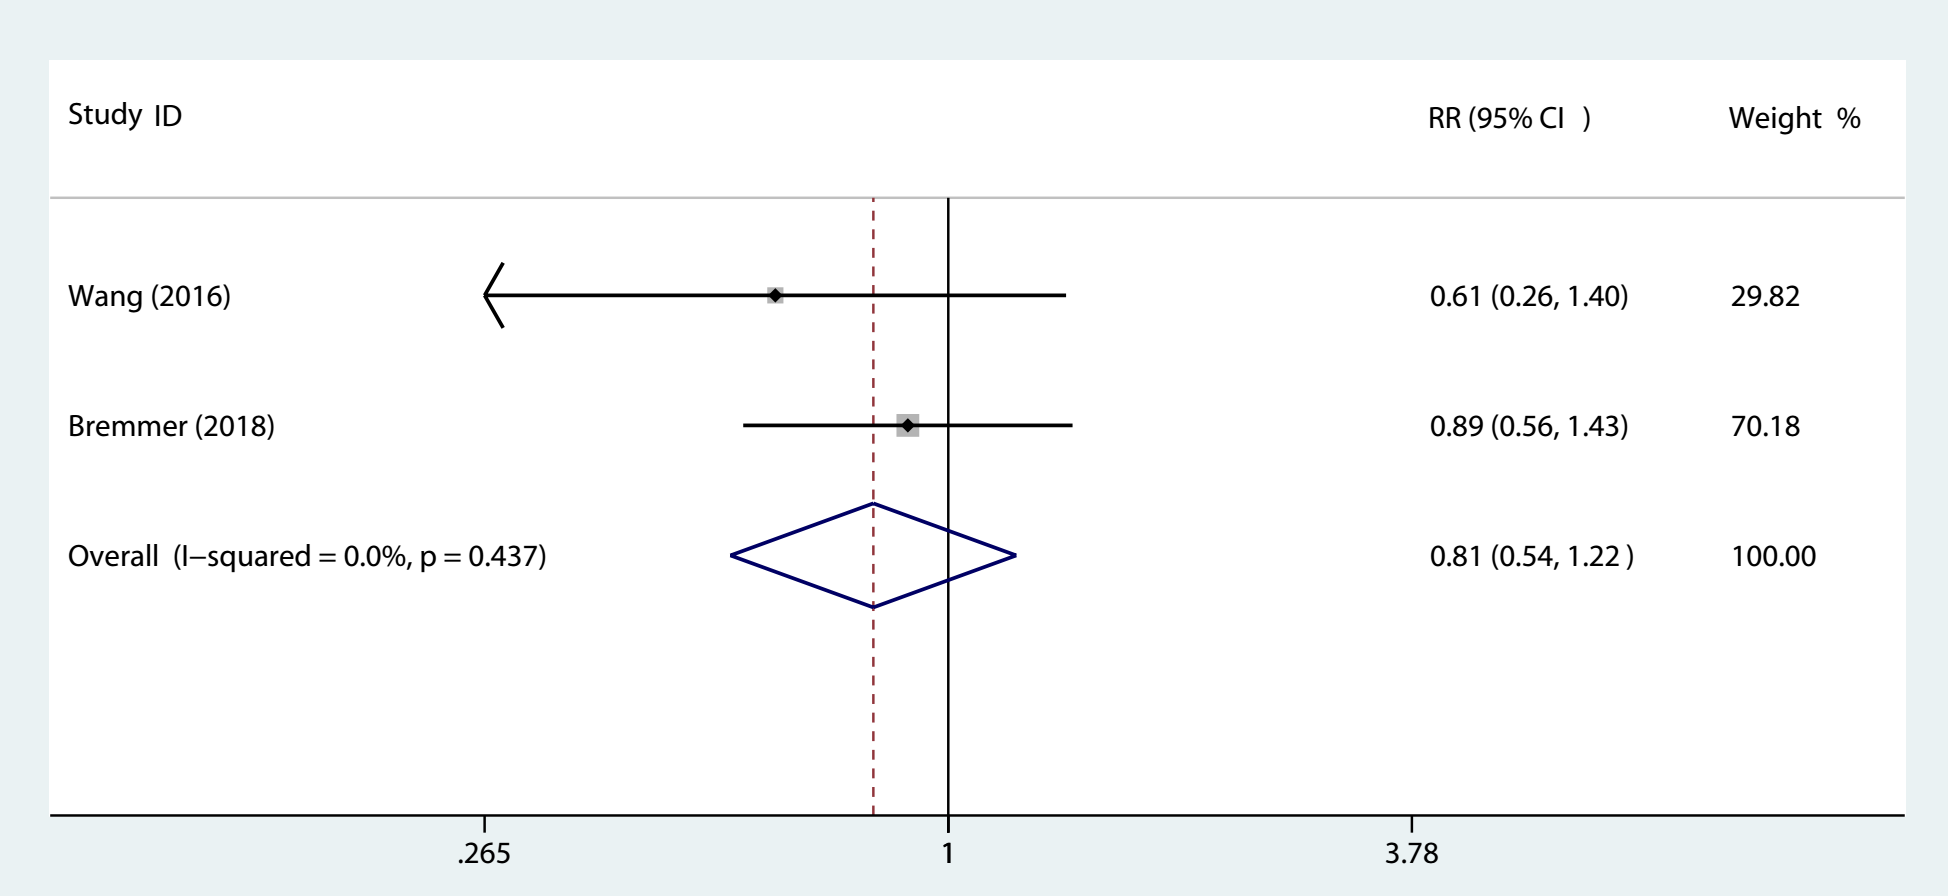


Supplemental 10. Forrest plot of antibiotic treatment for patients with low PCT levels on re-hospitalization rate at 30-day follow up.


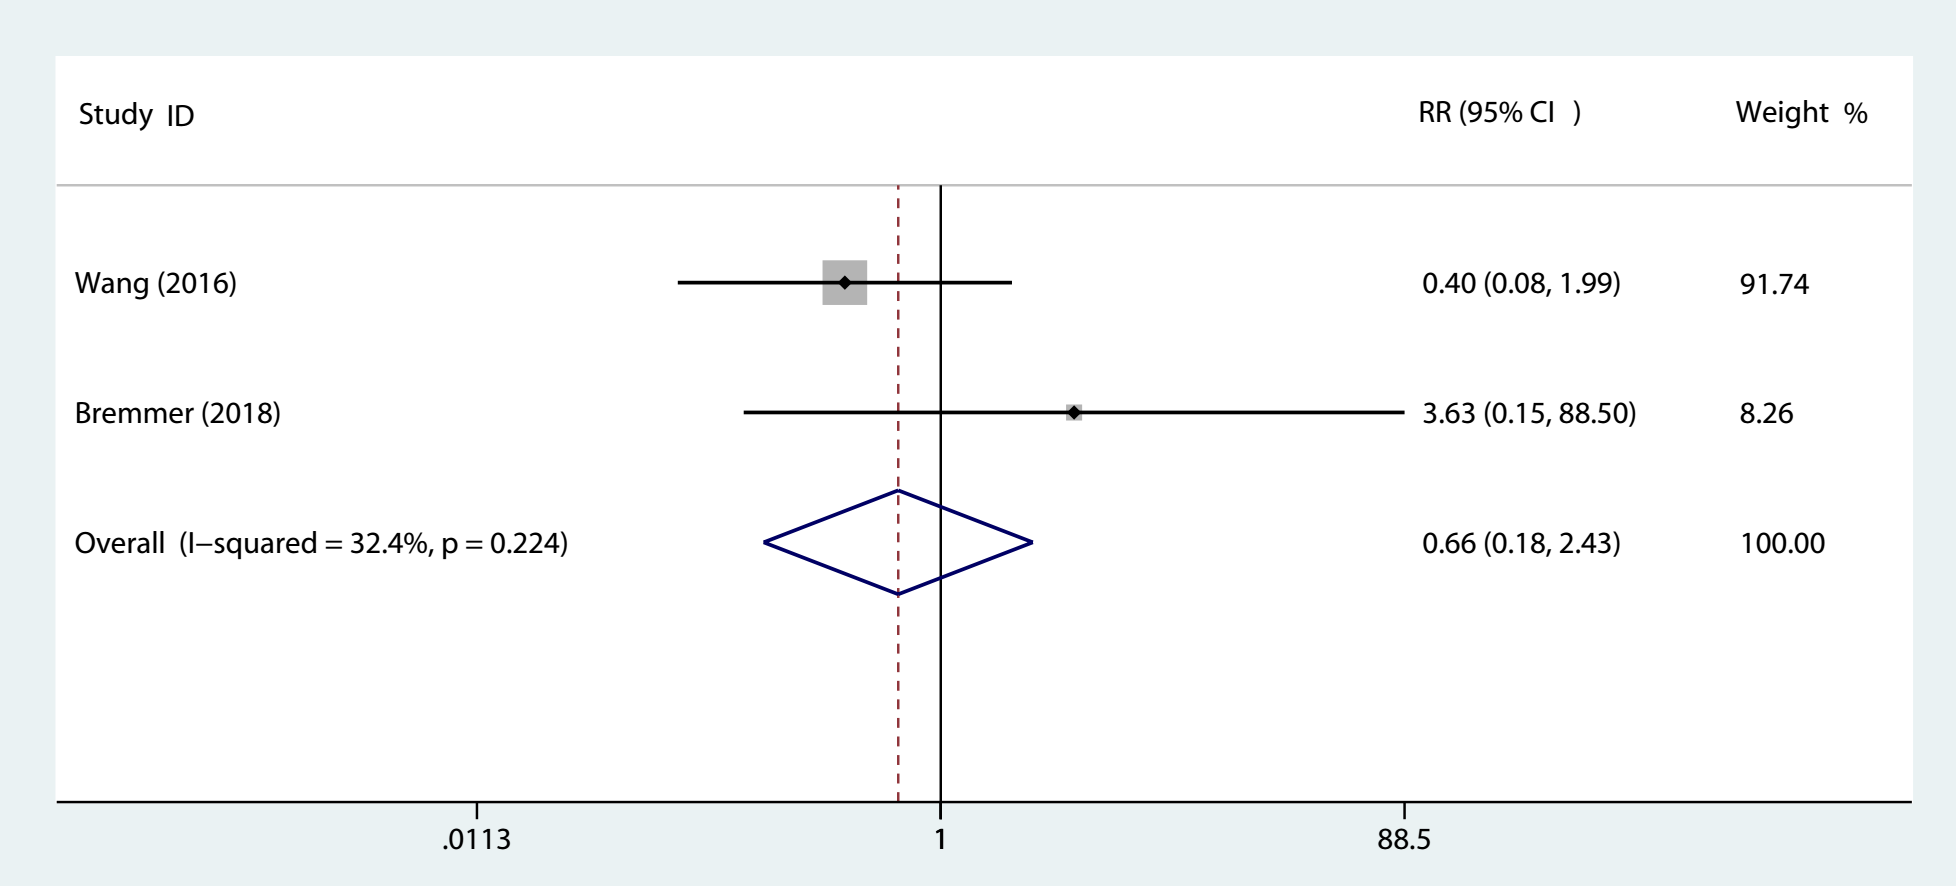


Supplemental 11. Forrest plot of antibiotic treatment for patients with low PCT levels on overall mortality rate at 30-day fellow up.
